# Supplementary material for: Organically templated linear and layered cadmium sulfatesElectronic supplementary information (ESI) available: powder diffraction data for IV, view of I down the a-axis, the structure of II in the ac-plane and a polyhedral view of IV in the ab-plane. See http://www.rsc.org/suppdata/dt/b2/b204482j/
Source: Royal Society of Chemistry journal article supplement (doi:10.1039/b204482j), 2002-09-13
Supplement: b204482j.doc [file b204482j.doc]

Table S1. Powder data for the compound IV.

| *h* | *k* | *l* | 2**obs­ | (2**)a | *d*calc | (*d*)b | *I*relc |
| --- | --- | --- | --- | --- | --- | --- | --- |
| 0 | 0 | 1 | 8.222 | 0.011 | 10.778 | -0.014 | 100.0 |
| 1 | 1 | 0 | 13.643 | -0.007 | 6.491 | 0.003 | 7.36 |
| 1 | 1 | 1 | 14.01 | -0.021 | 6.315 | 0.01 | 3.26 |
| 1 | -1 | 1 | 17.729 | -0.003 | 5.004 | 0.001 | 11.10 |
| 1 | 1 | 2 | 18.543 | 0.002 | 4.788 | -0.001 | 10.14 |
| 1 | -1 | -1 | 20.501 | 0.012 | 4.336 | -0.002 | 16.91 |
| 0 | 2 | 0 | 21.219 | -0.002 | 4.188 | 0.001 | 10.64 |
| 1 | -1 | 2 | 21.62 | 0.001 | 4.112 | 0 | 17.26 |
| 2 | 0 | 1 | 21.988 | 0.013 | 4.046 | -0.002 | 11.55 |
| 1 | -1 | -2 | 26.085 | 0.002 | 3.417 | 0 | 21.45 |
| 2 | 2 | 1 | 26.596 | -0.005 | 3.352 | 0.001 | 33.13 |
| 1 | -1 | 3 | 27.59 | 0.008 | 3.235 | -0.001 | 11.93 |
| 2 | 2 | 2 | 28.268 | -0.002 | 3.158 | 0 | 9.52 |
| 0 | 0 | 4 | 33.252 | -0.006 | 2.694 | 0.001 | 7.30 |
| 3 | 1 | 0 | 33.818 | 0.005 | 2.652 | -0.001 | 3.17 |
| 2 | -2 | 1 | 34.403 | -0.009 | 2.607 | 0 | 8.62 |
| 2 | -2 | 0 | 34.961 | -0.005 | 2.567 | 0 | 4.91 |
| 3 | 1 | -1 | 37.295 | -0.005 | 2.411 | 0 | 5.87 |
| 1 | 3 | -2 | 37.5 | -0.001 | 2.399 | 0 | 3.47 |
| 0 | 0 | 5 | 41.916 | -0.002 | 2.156 | 0 | 3.70 |
| 2 | 4 | 1 | 43.507 | 0.01 | 2.081 | -0.001 | 3.00 |
| 2 | 4 | 2 | 44.541 | 0.001 | 2.035 | 0 | 3.28 |

a2**obs­ - 2**calc ; b*d*obs - *d*calc ; c100  *I*/*I*max

Lines below 3% intensity have not been included in the refinement.
